# Supplementary material for: How Do MinC-D Copolymers Act on Z-Ring Localization Regulation? A New Model of Bacillus subtilis Min System
Source: PubMed Central journal article supplement (PMC9051478; doi:10.3389/fmicb.2022.841171), 2022-04-15
Supplement: Data_Sheet_2.pdf [file Data_Sheet_2.pdf]

## A.

|                        |                                                                |     |
|------------------------|----------------------------------------------------------------|-----|
| <i>E. coli</i>         | -----msntpielkgssftlsvvhlheaepkviqhaledkiaaqapafllkhpvvlvns    | 53  |
| <i>K. pneumoniae</i>   | -----msntpielkgssftlsvvhldanpevirqaledkiaaqapafllrhapvvvnia    | 53  |
| <i>P. aeruginosa</i>   | msqadlldqdpvfqlkgsmlavtilelahndlarlerqladkvaqapnffrdtplvmald   | 60  |
| <i>B. subtilis</i>     | ----mktkkqyvvtikgtkng---lthlhdacsfdelldg----lqnml-----sie      | 42  |
| <i>Listeria</i>        | -----mkknvqikgtksg---isiflsdkasiselqqe----lsqll-----adq        | 38  |
| <i>M. tuberculosis</i> | -----msspsidlkgsnftlsvlhlnnedpqieqavrekvsqapaffqnapvvlvns      | 53  |
| <i>H. pylori</i>       | ----mlktnqknvha-----feiekqepavmefleknhallqyfl-----iif          | 40  |
|                        | . : : . . : :                                                  |     |
| <i>E. coli</i>         | aledpv---nwsamhkavsatglrvigvsgckdaqlkaeiekmgplilteg-kek-----   | 104 |
| <i>K. pneumoniae</i>   | sieeev---ewraineaiaatglrimvsgckiprlkteidragipllteg-kek-----    | 104 |
| <i>P. aeruginosa</i>   | klpegegrldlpallevyrrhrlrtlairagreediaaaa-qaldplvpplsrgarerpldi | 119 |
| <i>B. subtilis</i>     | qytdgkqgq----kisvhvklgnrfl--ykeqeeqlteliaskkdlfvhsi-----       | 86  |
| <i>Listeria</i>        | kqnpysge-----klevqvqignrfl--seeereistihhnsqmkisaf-----         | 82  |
| <i>M. tuberculosis</i> | qissga---nlkiicravtdaglrivgisgcqdekrrvatrsqllneg-ksa-----      | 104 |
| <i>H. pylori</i>       | ky-----diepevkailrkhqllfletn---rtlng                           | 68  |
|                        | : :                                                            |     |
| <i>E. coli</i>         | ---apr-----papapqa-ptqnttpvtktrlidtpvrsgqriyapqcdli            | 146 |
| <i>K. pneumoniae</i>   | ---asr-----papsdptppppvasqitktrlidqpvvrsgqriyaphcdli           | 147 |
| <i>P. aeruginosa</i>   | kdstprkpaeeppsagearpepak-aekpaepvsrptkvvktpvrggmqiyaaggdli     | 178 |
| <i>B. subtilis</i>     | -dsevitk-k-----eaqq-----ireeaeiisvskivrsgvqlqvk-gdll           | 125 |
| <i>Listeria</i>        | -ysnvmsk-d-----eakk-----wkendqifsmatiirsgqvvp-gdfl             | 121 |
| <i>M. tuberculosis</i> | ---rvaep-ea-----pepetpavssaadsscrktrlinvpvrsgqriyapnsdli       | 151 |
| <i>H. pylori</i>       | rhiktmlskee-----tdhakpnh-----sktepkttiyerhirsgeeiysa-nhli      | 114 |
|                        | : * . : : . : :                                                |     |
| <i>E. coli</i>         | vtshvsagaeliadgnihvygmmrgralagasgdretqifctnlmaelvsiaageywlsdq  | 206 |
| <i>K. pneumoniae</i>   | vtnhvsagaeliadgnihvygmmrgralagaggdrdaqifcthlaaelvsiaageywlsdn  | 207 |
| <i>P. aeruginosa</i>   | vlaavspgaelladgnihvygpmrgralagvkgdatarifcqlaaelvsiaagnykvaed   | 238 |
| <i>B. subtilis</i>     | ligdvnpggtvraggnifvlgsllkghahagfngnnqaviaaasemlptqlrinhvlnrspd | 185 |
| <i>Listeria</i>        | ligdvnpggqirsngnvfvlgnikgiihagfegdenavvagkflypsqvriagkyvfgds   | 181 |
| <i>M. tuberculosis</i> | vtanvsagaeliadgnihyglmrgrv lagaagdesqifcthlaelisiagqywlsdq     | 211 |
| <i>H. pylori</i>       | flgnihngakii segcvsvygvcegaivcf-----gerlilkevksaqivfqnki       | 164 |
|                        | . : * . : : * : : * . * . : :                                  |     |
| <i>E. coli</i>         | ip-aefygkaarqlvenaltv--qpln-----                               | 231 |
| <i>K. pneumoniae</i>   | ip-aefygkaarlrldgesalai--qpln-----                             | 232 |
| <i>P. aeruginosa</i>   | lrrspqwgkavhvsllsgdvlni--trl-----                              | 263 |
| <i>B. subtilis</i>     | ---hiqkgnemecayltdgmvierlqhlalrpdltrlegg                       | 226 |
| <i>Listeria</i>        | edykevadtldfsafvndageivideihkkirkirpeisnfqggr                  | 225 |
| <i>M. tuberculosis</i> | ip-gefagkaaklslvnnelti--nnli-----                              | 236 |
| <i>H. pylori</i>       | ls-----lkeverllvnkniki-itknddildikevl-----                     | 195 |

## B.

|                        |        |        |        |        |        |        |        |
|------------------------|--------|--------|--------|--------|--------|--------|--------|
| <i>E. coli</i>         | 100.00 | 75.76  | 38.16  | 18.69  | 17.59  | 58.87  | 21.69  |
| <i>K. pneumoniae</i>   | 75.76  | 100.00 | 37.99  | 18.69  | 18.59  | 56.90  | 21.08  |
| <i>P. aeruginosa</i>   | 38.16  | 37.99  | 100.00 | 23.30  | 20.98  | 39.06  | 21.86  |
| <i>B. subtilis</i>     | 18.69  | 18.69  | 23.30  | 100.00 | 36.94  | 17.91  | 15.82  |
| <i>Listeria</i>        | 17.59  | 18.59  | 20.98  | 36.94  | 100.00 | 17.82  | 22.29  |
| <i>M. tuberculosis</i> | 58.87  | 56.90  | 39.06  | 17.91  | 17.82  | 100.00 | 17.65  |
| <i>H. pylori</i>       | 21.69  | 21.08  | 21.86  | 15.82  | 22.29  | 17.65  | 100.00 |

**Supplement Figure S2.** Sequence comparison of MinC of different bacteria (A) and their similarity percentage analysis (B) using Clustal Omega software. MinC shares only about 23% identity between *B. subtilis* and *P. aeruginosa*.

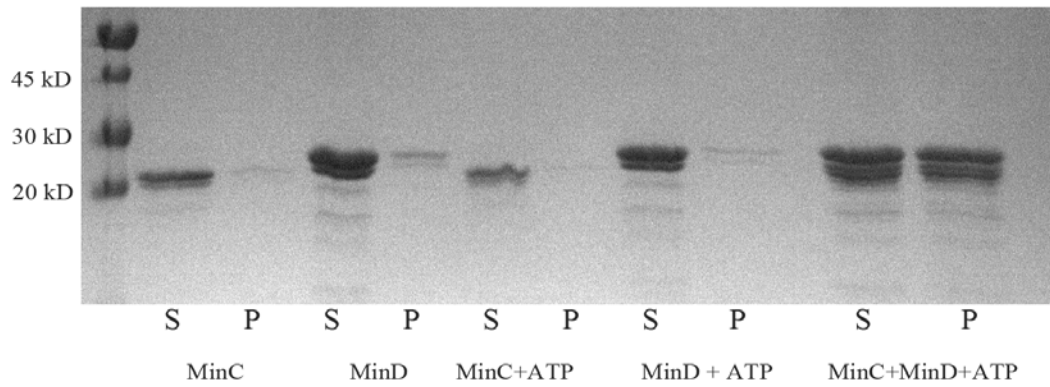

Supplement Figure S3. SDS-PAGE analysis of co-sedimentation of BsMinC and BsMinD proteins. After centrifugation at 50,000 rpm at 20 minutes, no protein were observed in the pellet for BsMinC and BsMinD alone. For the mixture of BsMinC and BsMinD with ATP, the ratio of MinC and MinD of the pellet is 1:1. The concentration of BsMinC and BsMinD is 10  $\mu$ M and ATP is 1 mM.
